# Supplementary material for: Transplantation of human skin microbiota in models of atopic dermatitis
Source: JCI journal article supplement (doi:10.1172/jci.insight.86955), 2016-07-06
Supplement: sd1 [file 1]

708  
709

**Tables:**  
**Supplemental Table 1:**

| HV | Age | Sex | Race | SCORAD | CGN Isolates     |                              |                          |
|----|-----|-----|------|--------|------------------|------------------------------|--------------------------|
| 1  | 61  | M   | W    | 0      | <i>R. mucosa</i> |                              |                          |
| 2  | 30  | M   | B    | 0      | <i>R. mucosa</i> | <i>Pantoea septica</i>       | <i>M. osloensis</i>      |
| 3  | 28  | F   | M    | 0      | <i>R. mucosa</i> |                              |                          |
| 4  | 32  | F   | W    | 0      | <i>R. mucosa</i> |                              |                          |
| 5  | 35  | F   | W    | 0      | <i>R. mucosa</i> |                              |                          |
| 6  | 24  | M   | B    | 0      |                  | <i>P. aeruginosa</i>         |                          |
| 7  | 65  | M   | W    | 0      | <i>R. mucosa</i> |                              |                          |
| 8  | 33  | M   | M    | 0      | <i>R. mucosa</i> |                              |                          |
| 9  | 45  | F   | A    | 0      | <i>R. mucosa</i> | <i>P. luteola</i>            |                          |
| 10 | 24  | M   | W    | 0      |                  | <i>Methylobacterium spp.</i> |                          |
| 11 | 32  | F   | A    | 0      |                  | <i>Methylobacterium spp</i>  |                          |
| 12 | 35  | M   | A    | 0      |                  | <i>P. luteola</i>            | <i>A. radioresistens</i> |
| 13 | 26  | F   | W    | 0      | <i>R. mucosa</i> | <i>P. oryzae</i>             |                          |
| 14 | 21  | M   | A    | 0      | <i>R. mucosa</i> |                              |                          |
| 15 | 21  | F   | B    | 0      | <i>R. mucosa</i> |                              |                          |
| 16 | 21  | F   | A    | 0      | <i>R. mucosa</i> |                              |                          |
| 17 | 21  | F   | A    | 0      | <i>R. mucosa</i> |                              |                          |
| 18 | 21  | M   | A    | 0      | <i>R. mucosa</i> |                              |                          |
| 19 | 44  | M   | W    | 0      | <i>R. mucosa</i> |                              |                          |
| 20 | 8   | M   | M    | 0      | <i>R. mucosa</i> |                              |                          |
| 21 | 22  | M   | H    | 0      | <i>R. mucosa</i> |                              |                          |
| 22 | 48  | F   | W    | 0      | <i>R. mucosa</i> |                              |                          |
| 23 | 40  | F   | W    | 0      | <i>R. mucosa</i> |                              |                          |
| 24 | 48  | F   | W    | 0      | <i>R. mucosa</i> |                              |                          |
| 25 | 40  | F   | B    | 0      | <i>R. mucosa</i> |                              |                          |
| 26 | 22  | M   | W    | 0      |                  | NONE                         |                          |

710

| AD | Age | Sex | Race | SCORAD at time of eval. | CGN Isolates     |                    |  |
|----|-----|-----|------|-------------------------|------------------|--------------------|--|
| 1  | 9   | M   | W    | 4                       | <i>R. mucosa</i> |                    |  |
| 2  | 8   | M   | A    | 45                      | <i>R. mucosa</i> |                    |  |
| 3  | 5   | M   | A    | 56                      | <i>R. mucosa</i> |                    |  |
| 4  | 16  | M   | A    | 33                      | <i>R. mucosa</i> |                    |  |
| 5  | 21  | M   | A    | 16                      |                  | <i>P. oryzae</i>   |  |
| 6  | 12  | F   | B    | 8                       |                  | <i>P. oryzae</i>   |  |
| 7  | 19  | F   | W    | 16                      |                  | <i>C. gilardii</i> |  |
| 8  | 6   | M   | W    | 14                      |                  | NONE               |  |
| 9  | 46  | M   | W    | 9                       |                  | NONE               |  |
| 10 | 16  | F   | W    | 2                       |                  | NONE               |  |
| 11 | 8   | F   | W    | 4                       |                  | NONE               |  |
| 12 | 11  | M   | B    | 18                      |                  | NONE               |  |
| 13 | 19  | M   | W    | 56                      |                  | NONE               |  |
| 14 | 51  | M   | M    | 13                      |                  | NONE               |  |
| 15 | 20  | M   | B    | 34                      |                  | NONE               |  |
| 16 | 33  | F   | W    | 1                       |                  | NONE               |  |
| 17 | 14  | M   | M    | 4                       |                  | NONE               |  |

711  
712  
713

**Supplemental Table 1:** Age, sex, race, SCORAD at time of swabbing, and CGN species isolated for each participant included in Figure 1A. Patients with atopic dermatitis all

714 carried a clinical diagnosis of atopic dermatitis at the time of evaluation at an Allergy  
 715 and Immunology Clinic at NIH Clinical Center. HV = healthy volunteer, AD = atopic  
 716 dermatitis, SCORAD = Scoring Atopic Dermatitis index scale, CGN = culturable Gram-  
 717 negative, M = male, F = female, W = White, B = Black, H = Hispanic/Latino, A = Asian, M =  
 718 Mixed.

719  
 720  
 721  
 722  
 723  
 724

| Demographic           | Controls    | Patients    | Significance |
|-----------------------|-------------|-------------|--------------|
| <b>Number</b>         | 26          | 17          | --           |
| <b>Age</b>            |             |             |              |
| Mean (range)          | 32.5 (8-65) | 18.5 (5-51) | **           |
| <b>Sex (%)</b>        |             |             |              |
| Male                  | 50          | 70          | NS           |
| Female                | 50          | 30          |              |
| <b>Race (%)</b>       |             |             |              |
| White                 | 42          | 47          | NS           |
| Black                 | 15          | 18          |              |
| Hispanic              | 4           | 0           |              |
| Asian                 | 27          | 24          |              |
| Other/Mixed           | 12          | 12          |              |
| <b>SCORAD (range)</b> | 0 (0)       | 19.7 (1-56) | ****         |

725  
 726  
 727  
 728  
 729  
 730  
 731  
 732  
 733  
 734  
 735  
 736

**Supplemental Table 2: Demographics of controls and patients.** Age, sex, race, and SCORAD for participants included in Figure 1. Significance determined by Student's t test (age, SCORAD) or Chi squared (sex, race). \*\* = p <0.01, \*\*\*\* = p <0.001, NS = not significant.

## FIGURE S1

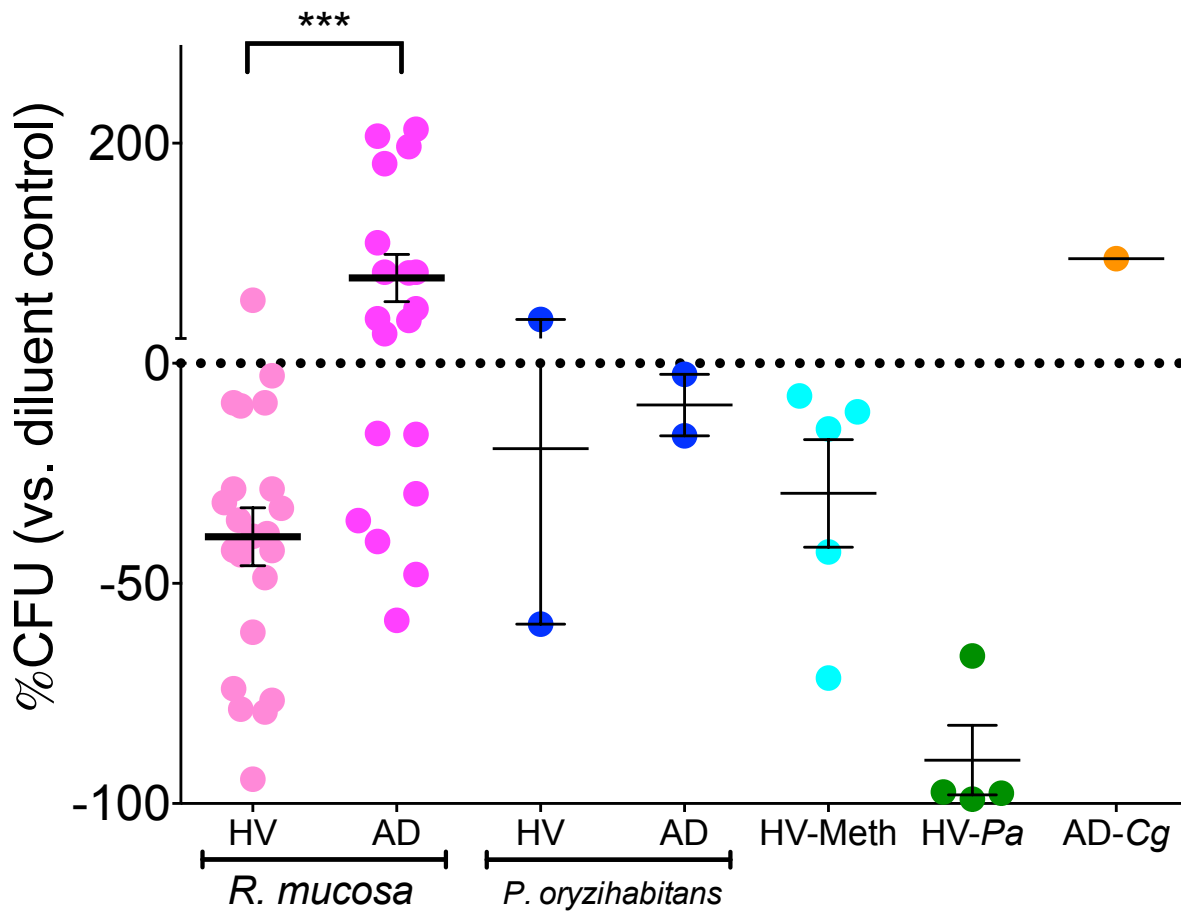

**Fig. S1: Species analysis of data from Fig. 1B.** Eight strains of *S. aureus* isolated from HV and AD patients were grown in the presence of either CGN supernatant or control media. Each data point represents the effect on *S. aureus* growth of supernatant from one CGN isolate compared to media control (HV isolates = 9, AD isolates = 7). Significance between *R. mucosa* isolates determined by Student t-test.

## FIGURE S2

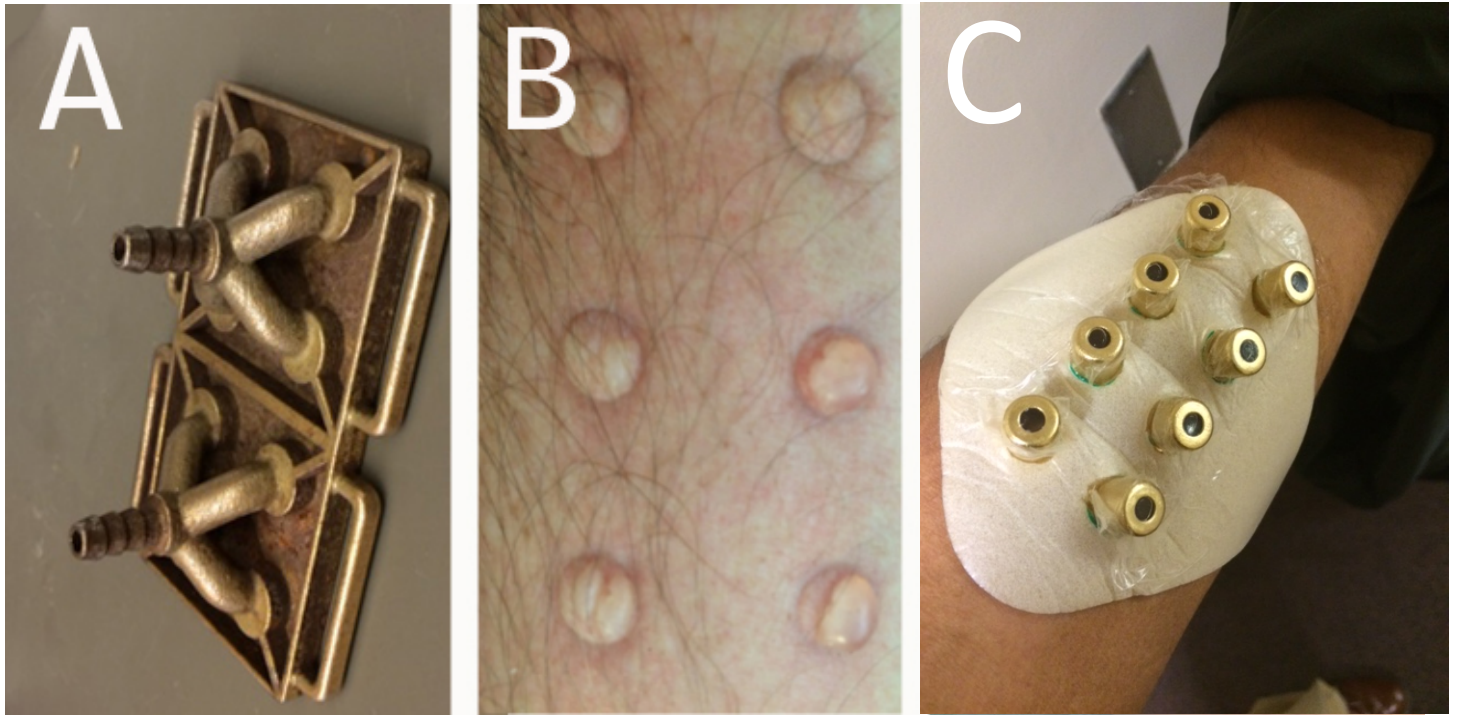

### **Fig. S2: Suction Blister Protocol**

(A) Image of 3D printed blister induction device. (B) Blister results 2 hours after suction. (C) Challenge chamber placed over denuded blister areas, bacterial isolates placed via pipette into the center of each challenge cap.

# FIGURE S3

## A

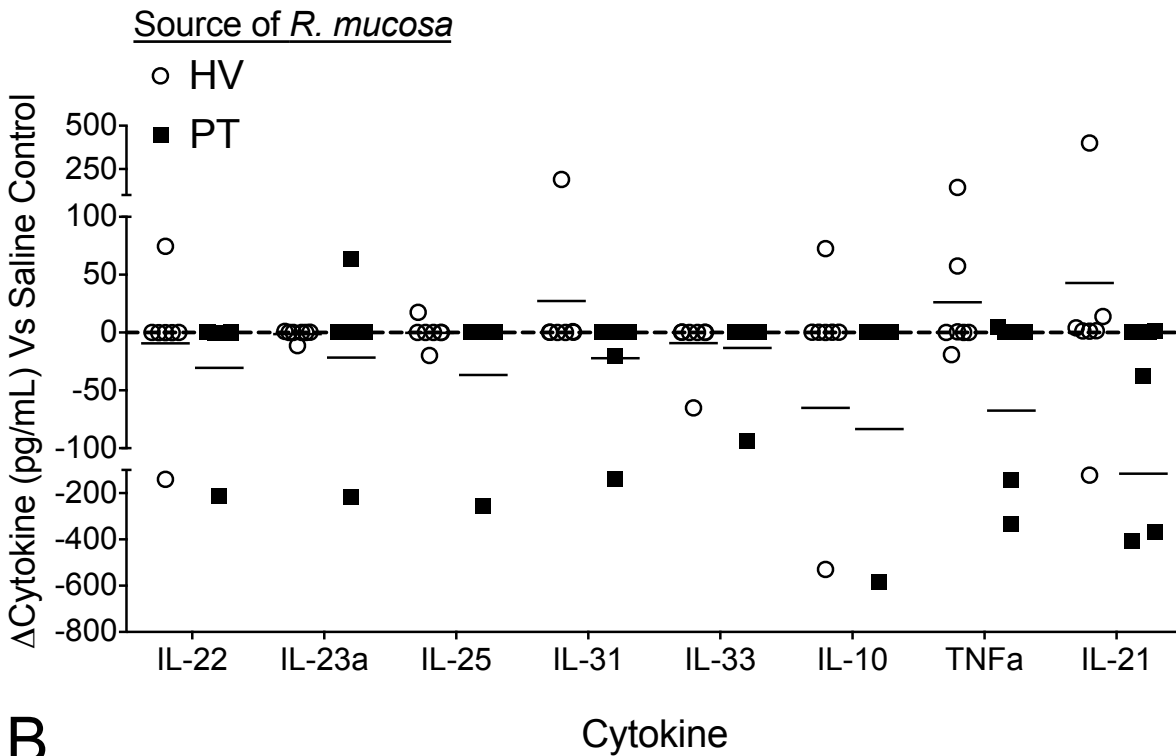

## B

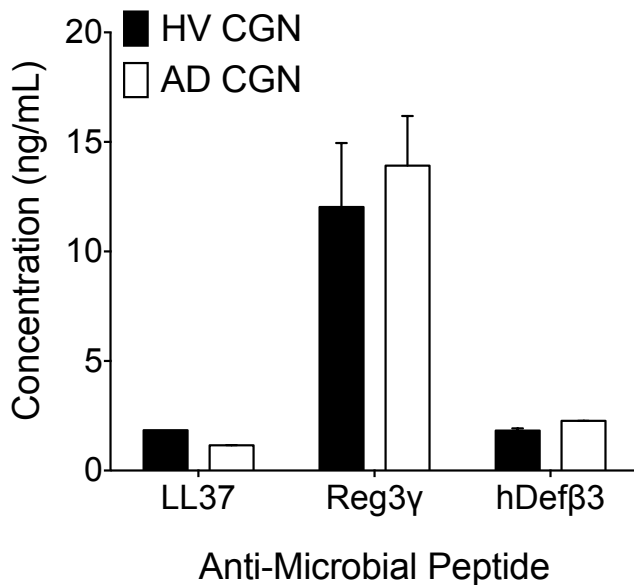

### Fig. S3: CGN impacts on cytokine and antimicrobial peptide responses

Cytokine analysis (a) and antimicrobial peptides (b) for in vivo human blister challenge (see supplemental methods), N= 7. Data shown are a combination of five independent experiments and displayed as mean + sem (b) or mean and individual participants (a).

# FIGURE S4

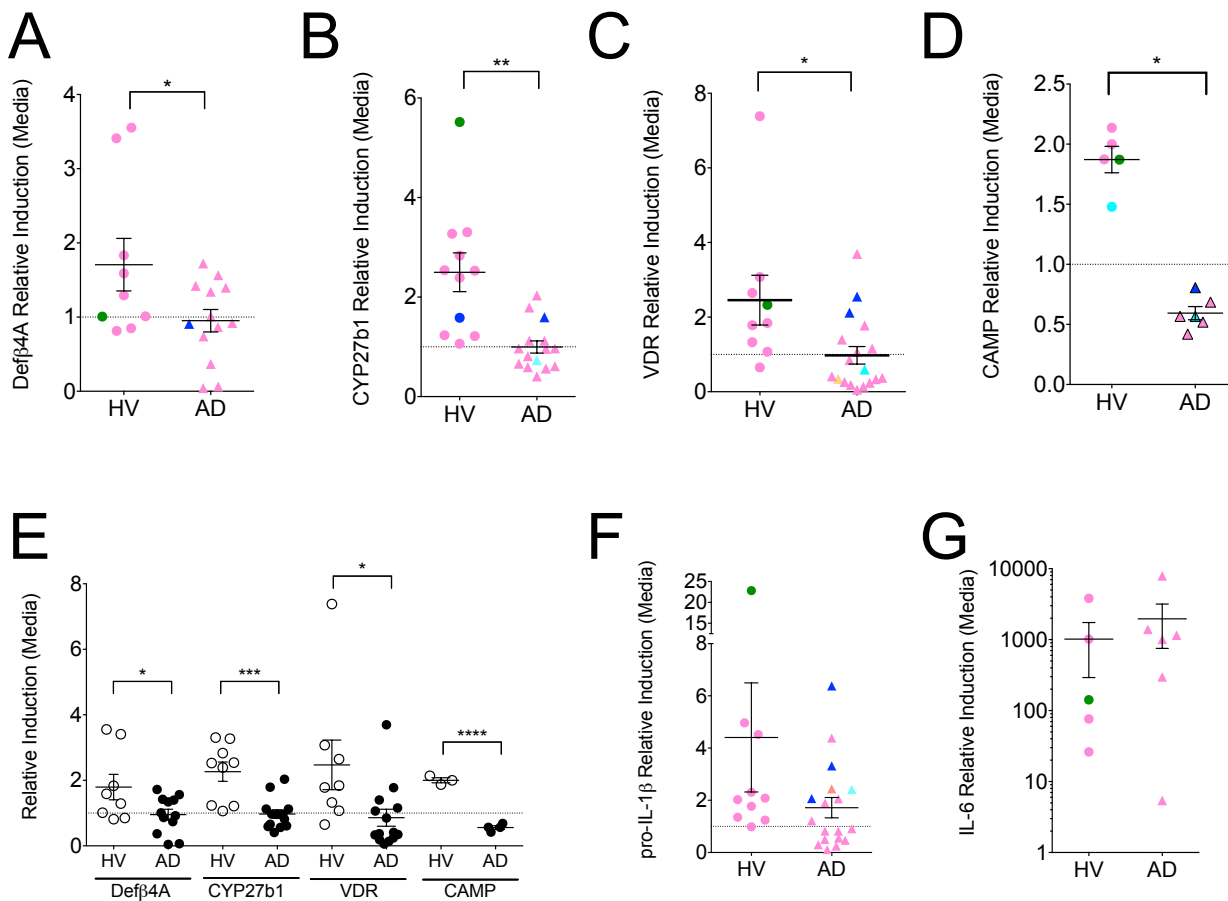

## Bacterial species:

- Roseomonas mucosa*
- P. aeruginosa*
- P. oryzae*
- C. gilardii*
- Methylobacterium

**Fig. S4: CGN stimulate primary human keratinocytes.** (A-D, F-G) Primary human foreskin keratinocytes were cultured to confluence.  $1 \times 10^7$  CFU of Gram-negative bacteria were added per well. mRNA was harvested from the KC 24 hours later and analyzed by PCR. (E) Data from A-D reanalyzed with only *R. mucosa* results. Data is representative of three independent experiments and displayed as mean  $\pm$  sem with individual dots representing KC cultured with distinct isolates. Significance determined by Student t-test within each gene marker. \* =  $p < 0.05$ , \*\* =  $p > 0.01$ .

# FIGURE S5

## A

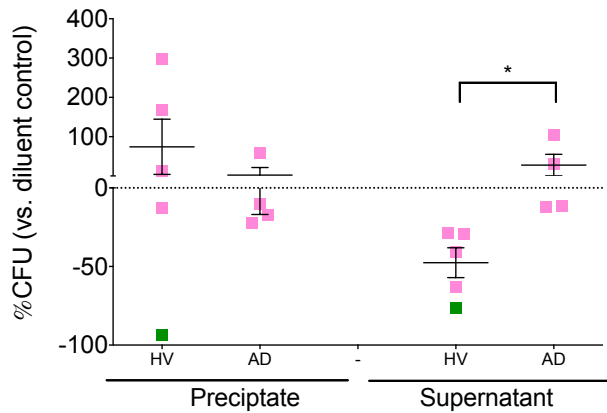

## B

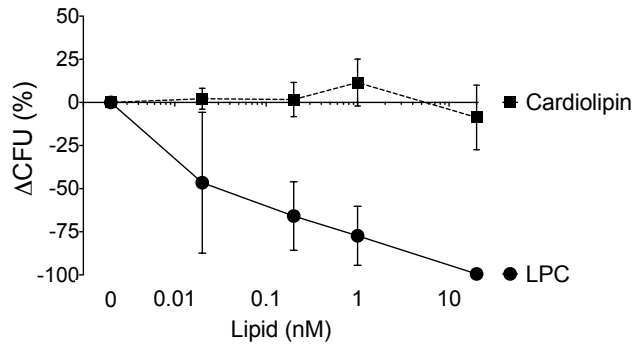

## C

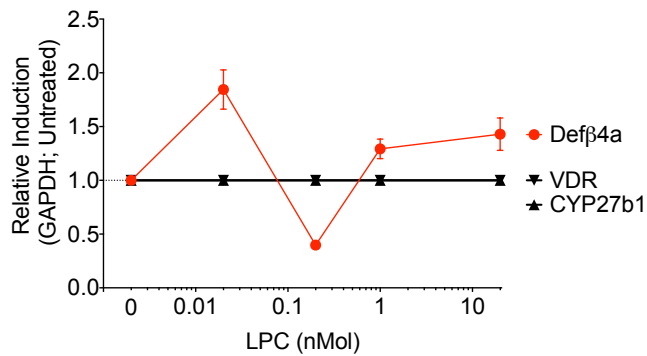

**Fig. S5: Lipid classes isolated from HV-*R. mucosa* supernatants inhibit *S. aureus* growth.** (A) Ammonium sulfate precipitation was performed on supernatants from *R. mucosa* and *P. aeruginosa* prior to evaluating the *S. aureus* (strain USA300) inhibition as performed in Fig. 1B. (B) Three isolates of *S. aureus* were cultured in the presence or absence of lysophosphatidylcholine (LPC) or cardiolipin with inhibition assessed as in Fig. 1B versus diluent (0). (C) Human foreskin keratinocytes were cultured in the presence or absence of LPC were assessed as in Fig. S3. Data is representative of three independent experiments and displayed as mean  $\pm$  sem. Significance determined by ANOVA with Bonferroni's correction. \* =  $p < 0.05$ .

## FIGURE S6

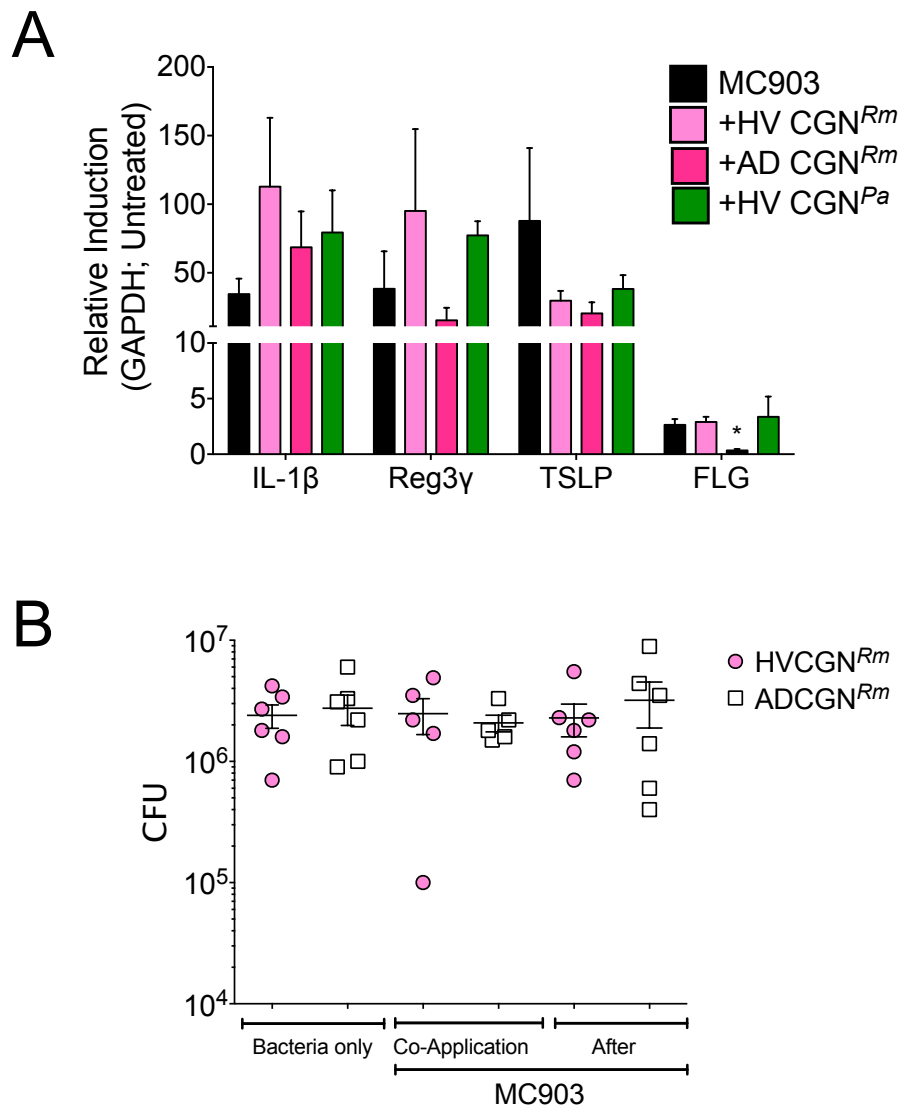

**Fig. S6: CGN immune activation and viability during and after MC903 challenge.** Mice underwent MC903 treatment along with inoculation of Gram-negative isolates as shown. (A) mRNA was harvested from ears on day 14 and analyzed by PCR. (B) CGN culture yields from mice inoculated with *R. mucosa* without other intervention (as in Fig. 2C), during MC903 (as in Fig. S6A), or after MC903 application (as in Fig. 3C). Data shown are representative of three independent experiments and displayed as mean + sem. Significant difference from MC903 shown as calculated by ANOVA. \* =  $p < 0.05$ .
